# Supplementary material for: Decoupling manufacturing from application in additive manufactured antimicrobial materials
Source: Royal Society of Chemistry journal article supplement (doi:10.1039/d1bm00430a), 2021-01-01

## Electronic Supplementary Information

### **Decoupling manufacturing from application in additive manufactured antimicrobial materials**

*Dominic J. Wales<sup>a,1</sup>, Sara Miralles-Comins<sup>b,2</sup>, Isabel Franco-Castillo<sup>c,‡</sup> Jamie M. Cameron<sup>d</sup>, Qun Cao<sup>a</sup>, Erno Karjalainen<sup>a</sup>, Jesum Alves Fernandes<sup>e</sup>, Graham N. Newton<sup>d</sup>, Scott G. Mitchell<sup>c,\*</sup>, Victor Sans<sup>b,\*</sup>*

<sup>a</sup>Faculty of Engineering, University of Nottingham, University Park, Nottingham, NG7 2RD, United Kingdom

<sup>b</sup>Institute of Advanced Materials (INAM), Universitat Jaume I, 12071, Castellon, Spain

\*Email: sans@uji.es

<sup>c</sup>Instituto de Nanociencia y Materiales de Aragón (INMA-CSIC), CSIC-Universidad de Zaragoza, c/ Pedro Cerbuna 12, 50009 Zaragoza, Spain. & CIBER de Bioingeniería, Biomateriales y Nanomedicina, Instituto de Salud Carlos III, 28029 Madrid, Spain

\*Email: scott.mitchell@csic.es

<sup>d</sup>GSK Carbon Neutral Laboratory, University of Nottingham, Jubilee Campus, Nottingham, NG8 2GA, United Kingdom

<sup>e</sup>School of Chemistry, University of Nottingham, University Park, Nottingham, NG7 2RD, United Kingdom

---

<sup>1</sup> Present Address: Hamlyn Centre, Institute of Global Health Innovation, Imperial College London, South Kensington Campus, London, SW7 2AZ, United Kingdom

<sup>2</sup> These authors have contributed equally

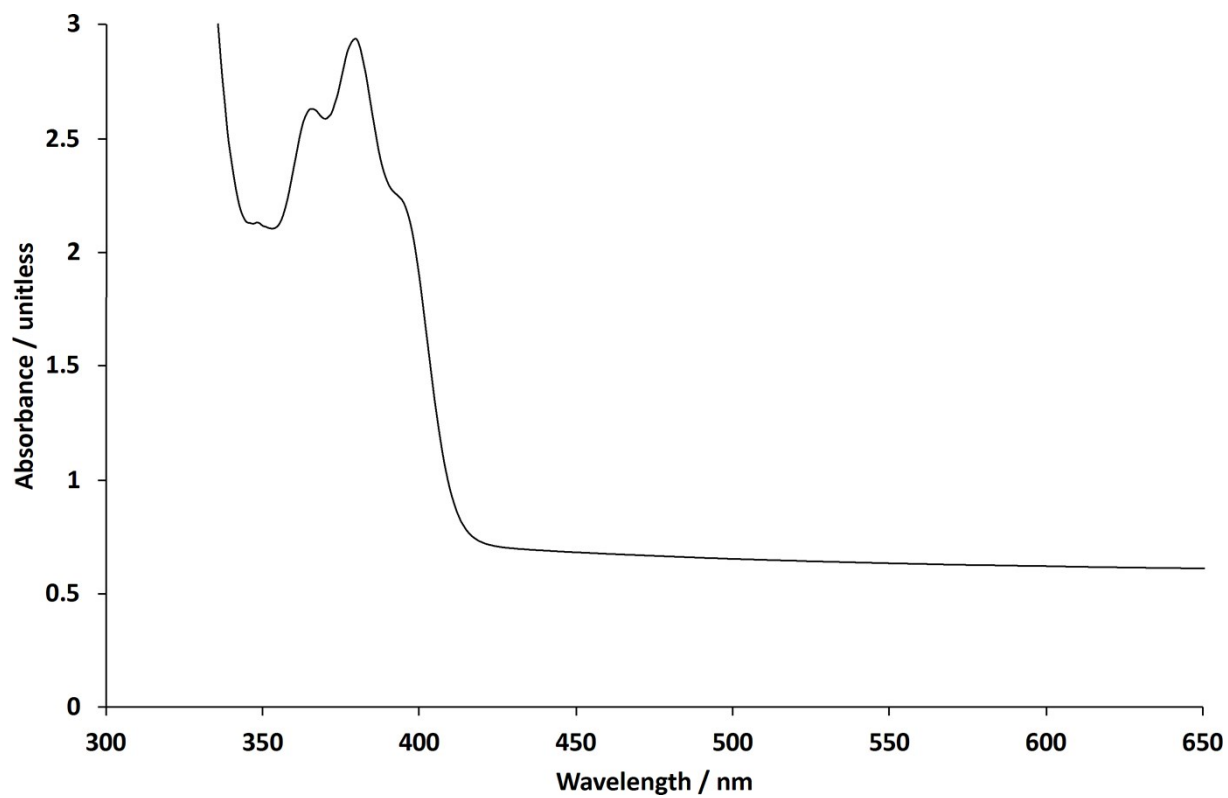

**Figure S1:** The transmission UV-Vis spectrum of a 3D printed **PIL1** part before post-printing UV photoreduction treatment.

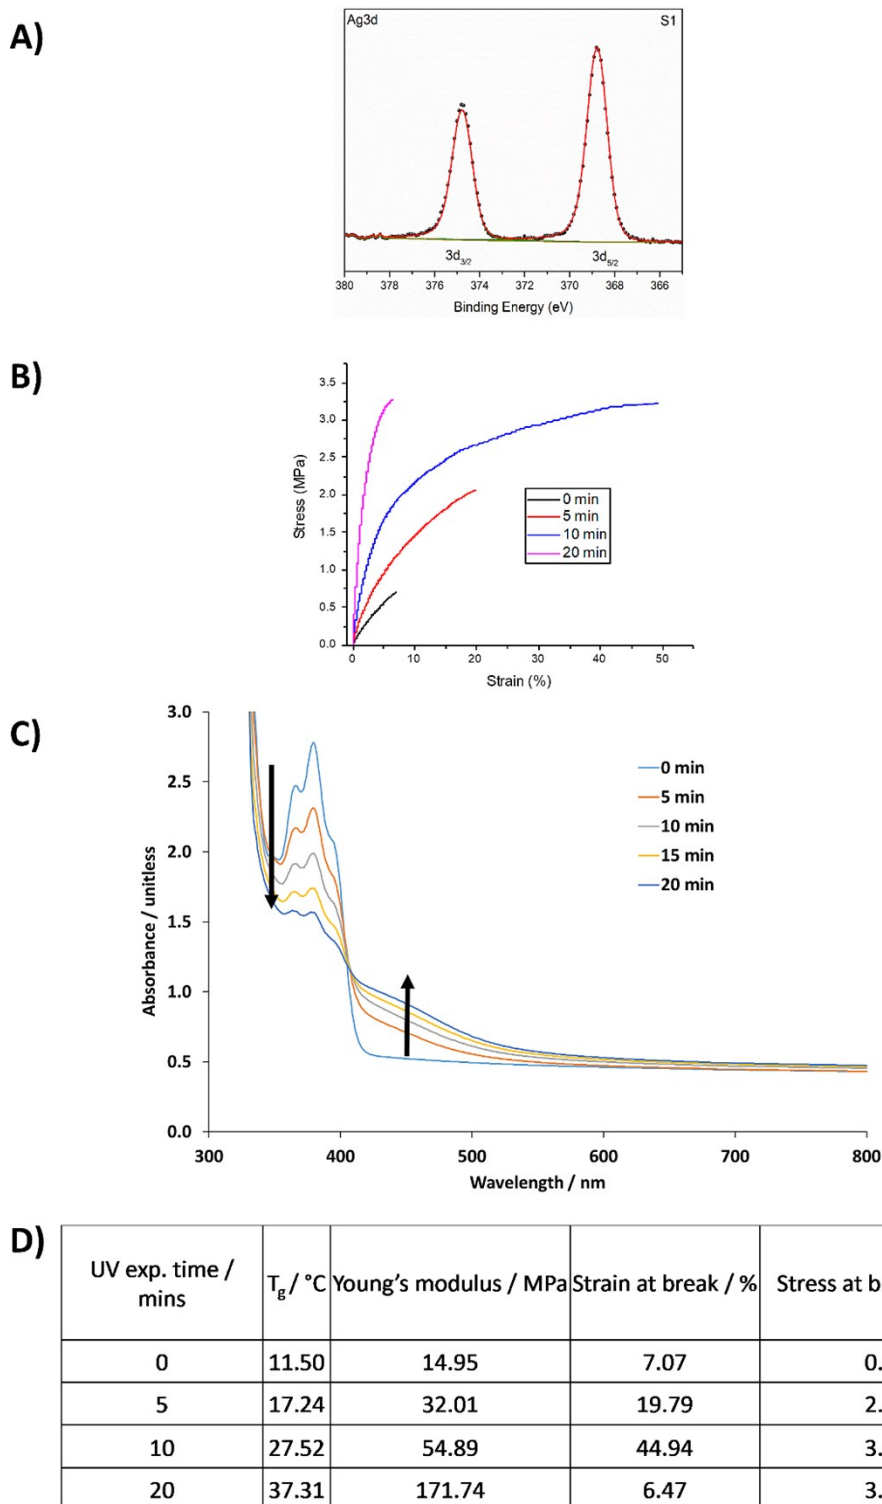

**Figure S2:** (A) XPS spectrum of a photoreduced **PIL1** 3D printed part XPS revealing the expected  $Ag3d_{3/2}$  and  $Ag3d_{5/2}$  peaks in the spectrum; (B) (Left) Stress-Strain curves for **PIL1** 3D printed parts demonstrating an increase in tensile stiffness with increasing UV exposure time; (C) UV-Visible transmission spectra of a piece of **PIL1** showing the increase in the shoulder feature at  $\lambda \approx 450$  nm, which is attributed to AgNPs, with increasing post-printing UV exposure time. The absorbance of the peak features attributed to the photoinitiator ( $\lambda_{max} = 380$  nm) decreased with increasing exposure time; (D) The tabulated mechanical property data for the samples.

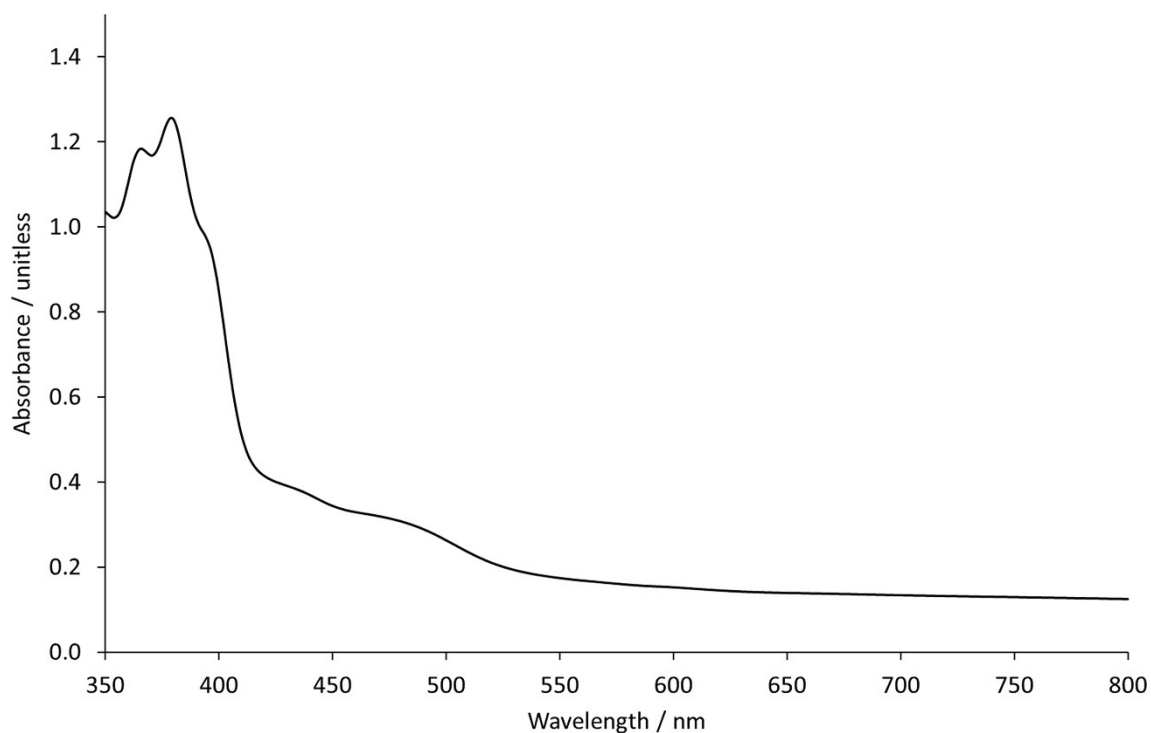

**Figure S3:** UV-visible spectrum of the analogous homogeneous liquid IL system, where  $\text{Ag}(\text{SbF}_6)$  ( $\sim 1$  wt%) was added to 80 mol% non-polymerisable 1-butyl-3-methylimidazolium bis(trifluoromethane)sulfonimide, 20 mol% 1,4-BDA and 1 mol% PI and photo-reduced under UV light ( $\lambda = 395$  nm) for 20 mins. The shoulder centred  $\sim 450$  nm is attributed to a poorly resolved plasmon due to the photoreduction of  $\text{Ag}^+$  to  $\text{Ag}^0$  and the formation of AgNPs in the liquid IL.

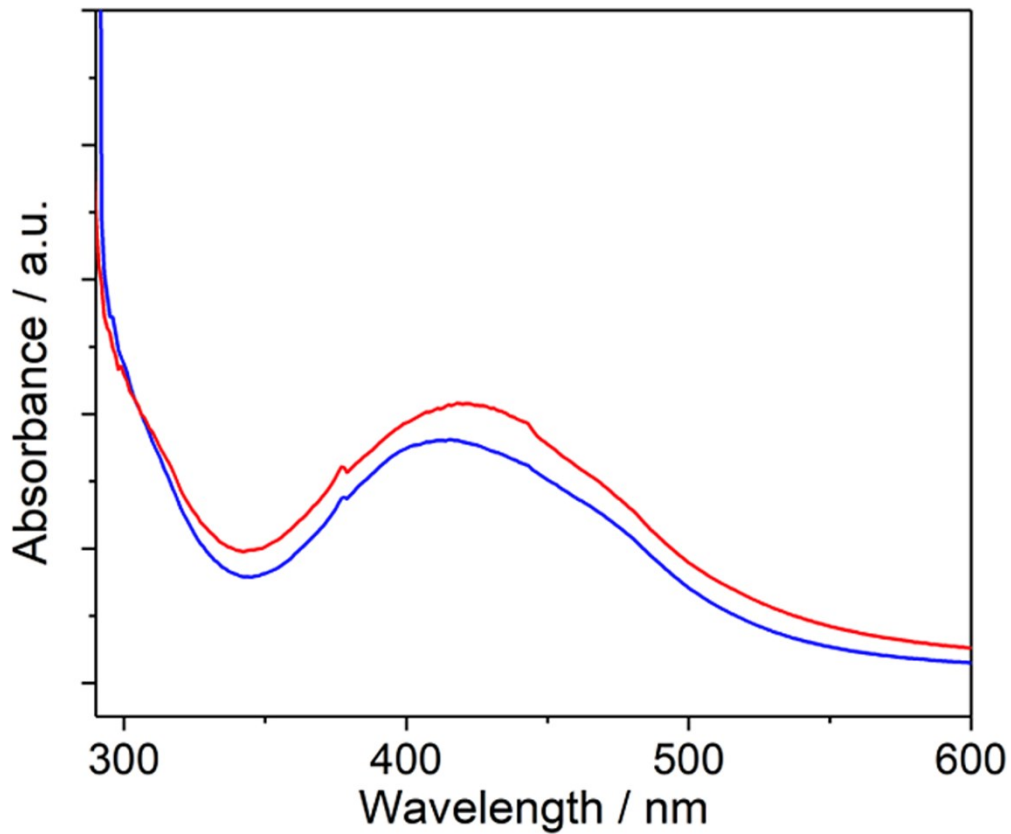

**Figure S4:** 3D-printed parts of **PIL2** (blue curve, BDA crosslinker) and **PIL3** (red curve, PEGDA crosslinker) showed a similar ability to stabilise AgNPs upon extended photoreduction under the same conditions. The small peak feature at  $\sim 380$  nm is attributed to residual PI.

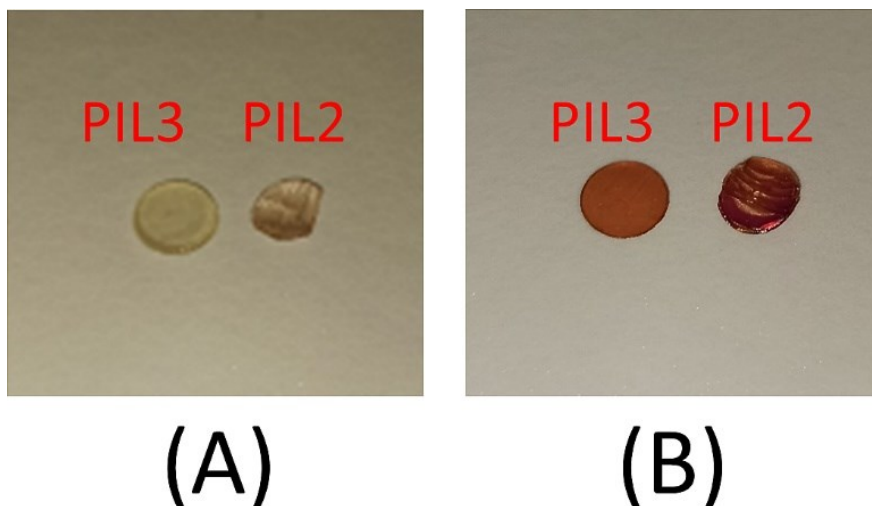

**Figure S5:** (A) 3D-printed parts of **PIL3** and **PIL2** before UV-exposure, further highlighting how the **PIL2** formulation deformed during 3D printing; whereas the **PIL3** formulation printed with better resolution; (B) 3D printed parts of both **PIL2** and **PIL3** formulations after 20 mins of UV exposure.

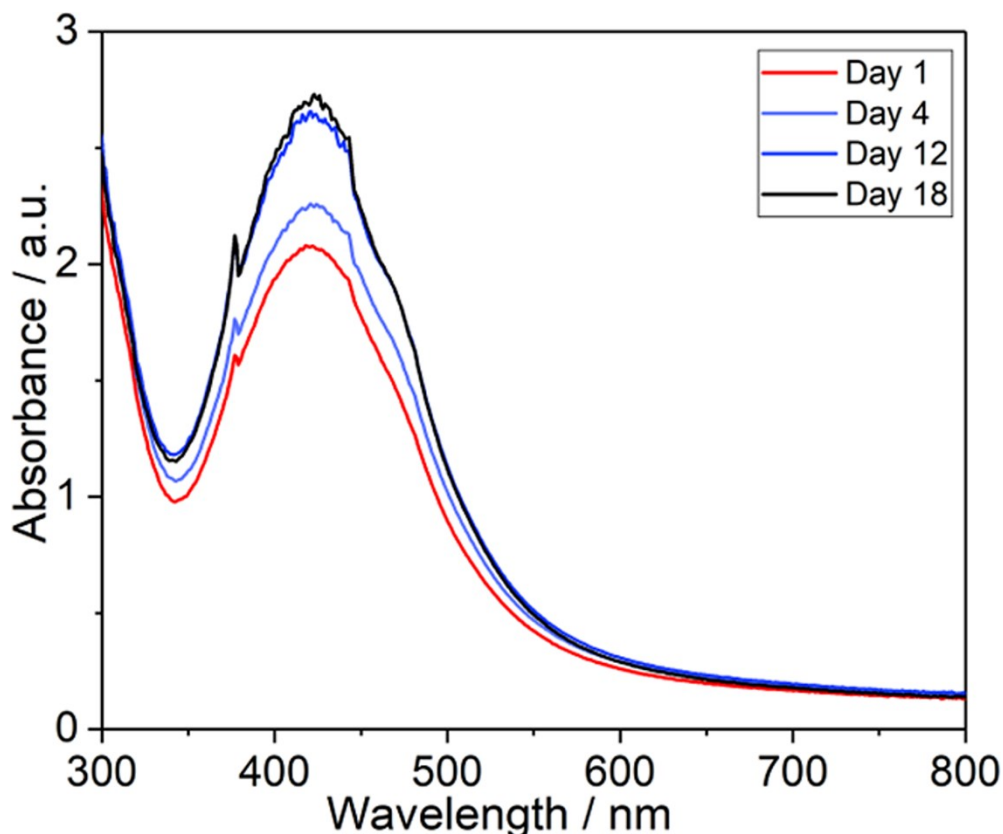

**Figure S6:** AgNP@PIL2 generated by post-curing photoreduction and aged under ambient light over a period of 18 days, causing an increase in the absorbance of the peak attributed to the AgNP plasmon.

### Synthesis of ionic liquids:

*1-butyl-3-vinylimidazolium bromide, [BVIM][Br] (precursor to **mIL1**):*

1-bromobutane (33 g, 240 mmol) dissolved in acetonitrile (10 mL) was added dropwise to a solution of 1-vinylimidazole (15 g, 160 mmol) in acetonitrile (15 mL). The resulting reaction mixture was left to react for 18 h at 40 °C. After evaporating the solvent, the crude product was then washed with diethyl ether (40 mL) four times. During the last wash the product crystallized becoming a white solid. The solid was re-dissolved in dichloromethane (5 mL) and slowly added to rapidly stirred diethyl ether (50 mL) to form a purer white solid. The solid product was dried under reduced pressure at room temperature for 6 h to afford 1-butyl-3-vinylimidazolium bromide (23.26 g, 63 %).

$^1\text{H}$  NMR (400 MHz,  $\text{CDCl}_3$ ):  $\delta$  / ppm = 10.85 (s, 1H), 7.94 (t,  $J$  = 2.0 Hz, 1H), 7.66 (t,  $J$  = 2.0 Hz, 1H), 7.45 (dd,  $J$  = 15.8, 8.4 Hz, 1H), 6.02 (dd,  $J$  = 15.8, 3.2 Hz, 1H), 5.36 (dd,  $J$  = 8.8, 3.2 Hz, 1H), 4.39 (t,  $J$  = 7.2 Hz, 2H), 1.95-1.87 (m, 2H), 1.41-1.31 (m, 2H), 0.93 (t,  $J$  = 7.2 Hz, 3H);  $^{13}\text{C}$  NMR (101 MHz,  $\text{CDCl}_3$ ):  $\delta$  / ppm = 135.9, 128.3, 122.9, 119.5, 109.9, 50.2, 32.1, 19.5, 13.5. Elemental Analysis: Calculated: C, 46.77; H, 6.54; N, 12.12; Found: C, 46.02; H, 6.13; N, 11.98.

smc-p75-cdcl3

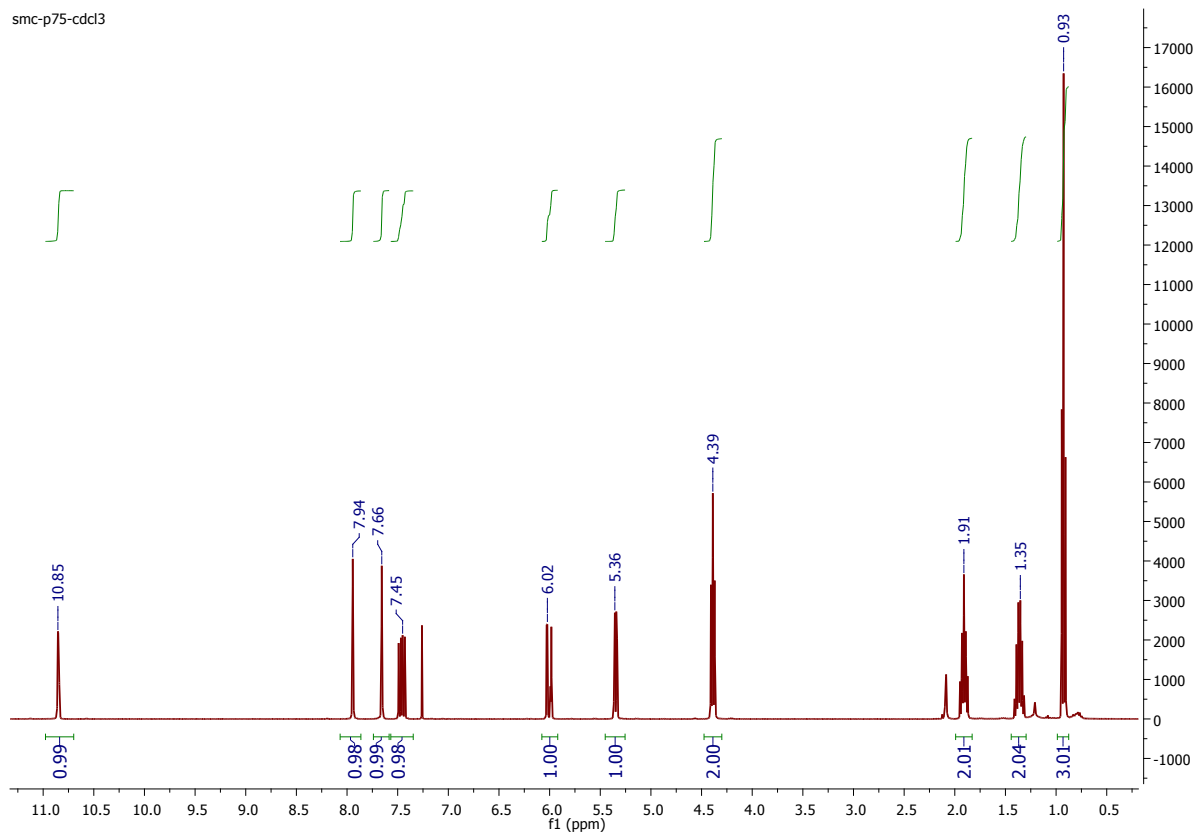

smc-p75-cdcl3

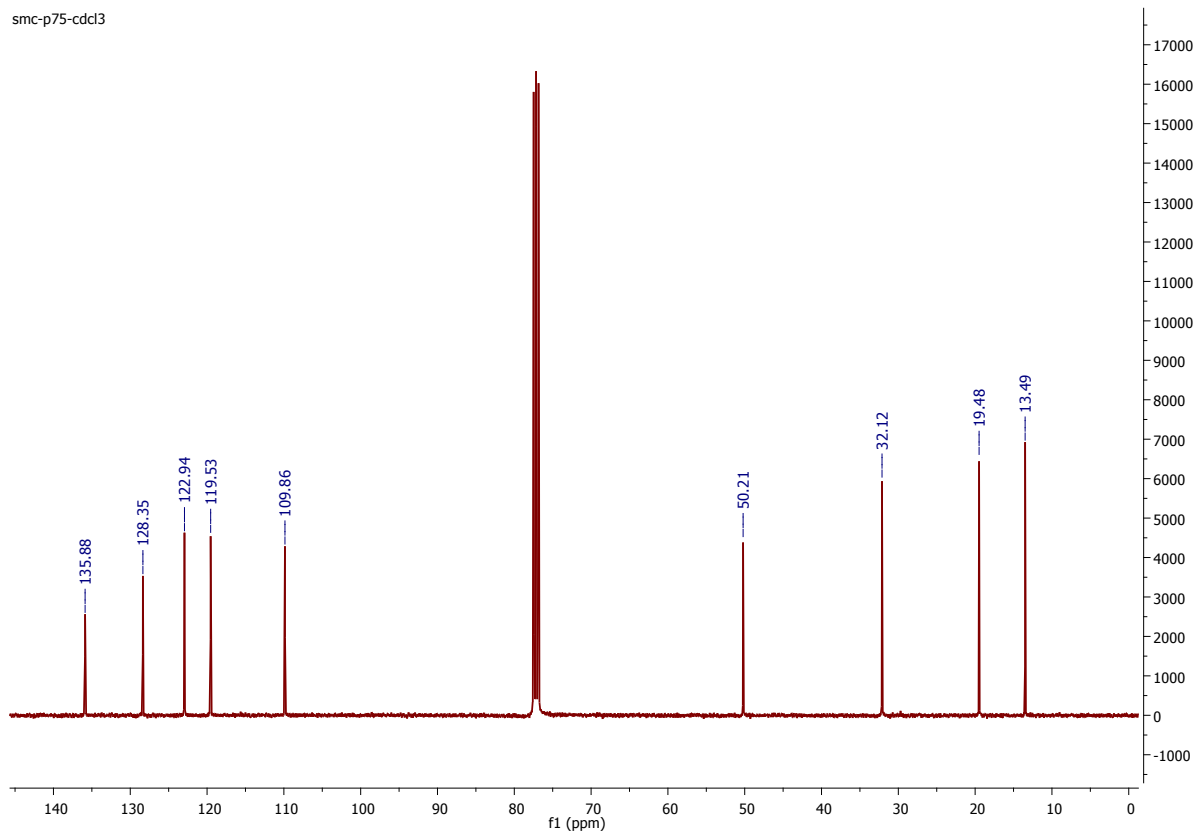

1-butyl-3-vinylimidazolium bis(trifluoromethane)sulfonimide, [BVIM][NTf<sub>2</sub>] (**mL1**):

Lithium bis(trifluoromethane) sulfonimide (LiNTf<sub>2</sub>) (22.35 g, 78 mmol) was dissolved in water (15 mL) and it was added dropwise to an aqueous solution (20 mL) of 1-butyl-3-vinylimidazolium bromide (15 g, 65 mmol), forming two liquid phases. The mixture was stirred rapidly for 6 h at room temperature. The phases were then separated and the aqueous phase was extracted three times with dichloromethane (50 mL). The combined organic phases were washed four times with water (75 mL) and dried over Na<sub>2</sub>SO<sub>4</sub>. The product was further dried under reduced pressure at 45 °C for 3 h. The yield was 77 % (21.50 g).

<sup>1</sup>H NMR (400 MHz, CDCl<sub>3</sub>): δ / ppm = 8.97 (s, 1H), 7.63 (t, J = 1.6 Hz, 1H), 7.45 (t, J = 2.0 Hz, 1H), 7.12 (dd, J = 15.6, 8.4 Hz, 1H), 5.80 (dd, J = 15.2, 2.8 Hz, 1H), 5.40 (dd, J = 8.4, 2.8 Hz, 1H), 4.21 (t, J = 7.6 Hz, 2H), 1.90-1.82 (m, 2H), 1.41-1.32 (m, 2H), 0.95 (t, J = 7.6 Hz, 3H); <sup>13</sup>C NMR (101 MHz, CDCl<sub>3</sub>): δ / ppm = 134.4, 128.1, 123.3, 121.5 (q, CF<sub>3</sub>), 119.5, 110.4, 50.4, 31.9, 19.4, 13.3. Elemental Analysis: Calculated: C, 30.63; H, 3.50; N, 9.74; Found: C, 31.47; H, 3.75; N, 9.92.

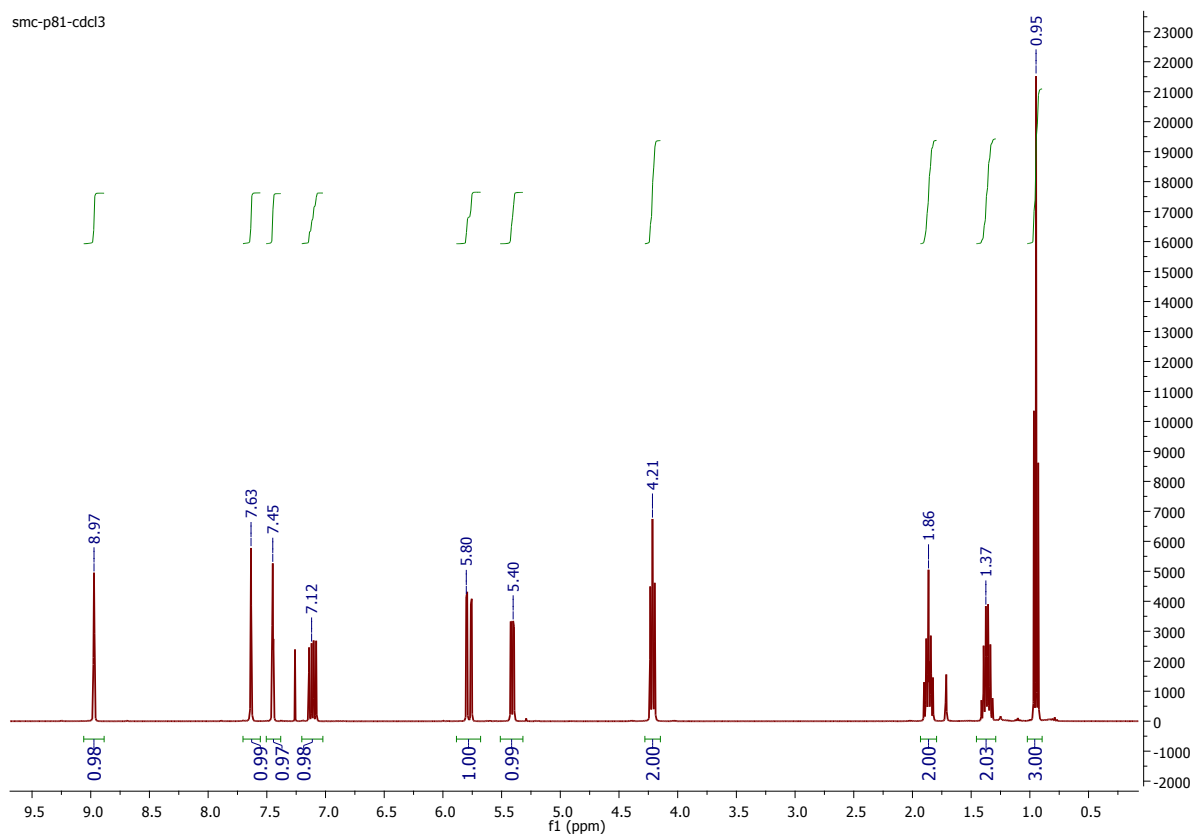



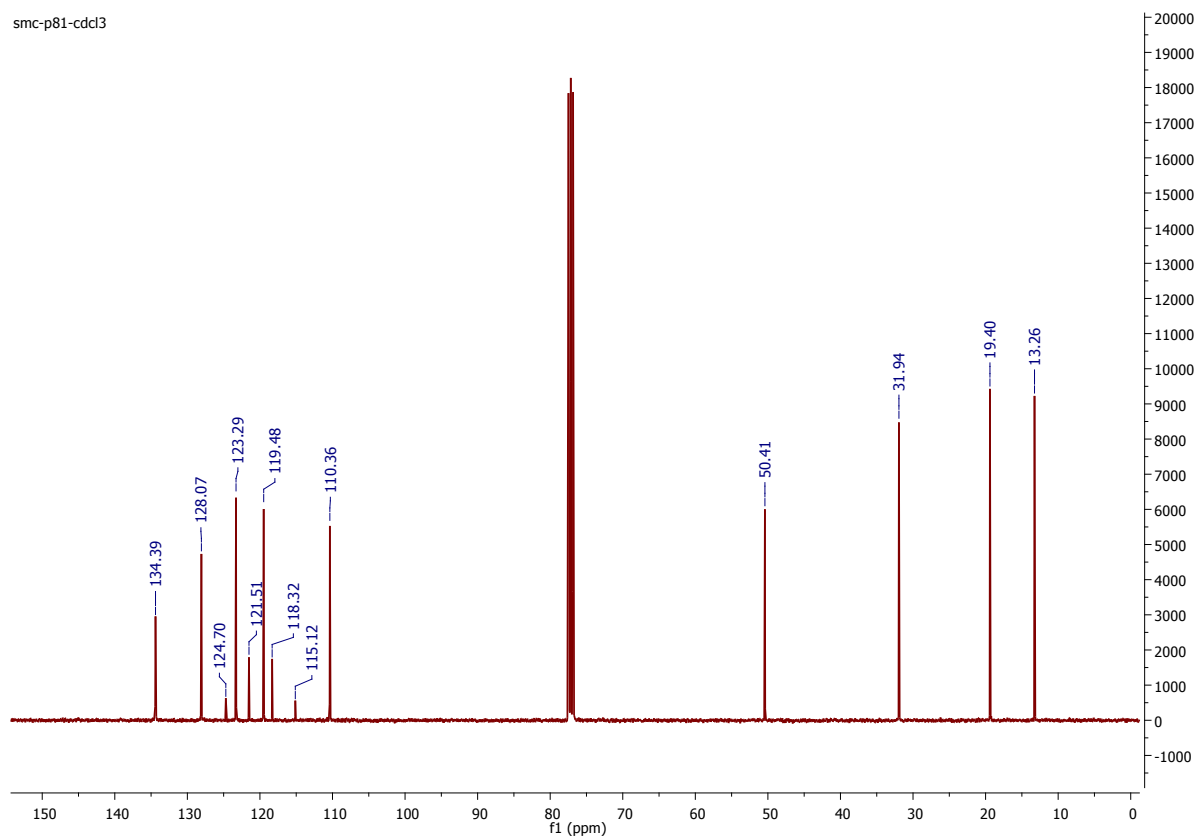

**1-(3-hydroxypropyl)-3-vinylimidazolium bis(trifluoromethane)sulfonimide, [POHVIm][NTf<sub>2</sub>] (miL2):**

1-(3-hydroxypropyl)-3-vinylimidazolium bis(trifluoromethane)sulfonimide was synthesized by anion metathesis of 1-(3-hydroxypropyl)-3-vinylimidazolium bromide [POHVIm][Br] with lithium bis(trifluoromethane)sulfonimide. The full synthesis procedure for [POHVIm][Br] and [POHVIm][NTf<sub>2</sub>]

1-bromopropanol (9.13 g, 64 mmol) dissolved in acetonitrile (4 mL) was added dropwise to a solution of 1-vinylimidazole (5 g, 53 mmol) in acetonitrile (8 mL). The resulting reaction mixture was left to react for 21 h at 40 °C. After evaporating the solvent, the crude product was then washed with diethyl ether (10 mL) four times. The crude product was re-dissolved in dichloromethane (2 mL) and slowly added to rapidly stirred diethyl ether (15 mL) to form a white solid. The solid product was dried under reduced pressure at room temperature for 6 h to afford 1-(3-hydroxypropyl)-3-vinylimidazolium bromide (7.66 g, 62 %).

<sup>1</sup>H NMR (400 MHz, CD<sub>3</sub>OD): δ / ppm = 9.43 (s, 1H), 8.08 (t, J = 1.6 Hz, 1H), 7.85 (t, J = 2.0 Hz, 1H), 7.33 (dd, J = 15.6, 8.8 Hz, 1H), 6.02 (dd, J = 15.6, 2.4 Hz, 1H), 5.51 (dd, J = 8.8, 2.8 Hz, 1H), 4.47 (t, J = 6.8 Hz, 2H), 3.69 (t, J = 5.6 Hz, 2H), 2.22-2.16 (m, 2H); <sup>13</sup>C NMR (101 MHz, CD<sub>3</sub>OD): δ / ppm = 136.7, 129.8, 124.6, 120.8, 109.9, 58.9, 48.5, 33.3. Elemental Analysis: Calculated: C, 41.22; H, 5.62; N, 12.02; Found: C, 41.65; H, 5.95; N, 12.17.

smc-p33-2lav-meod

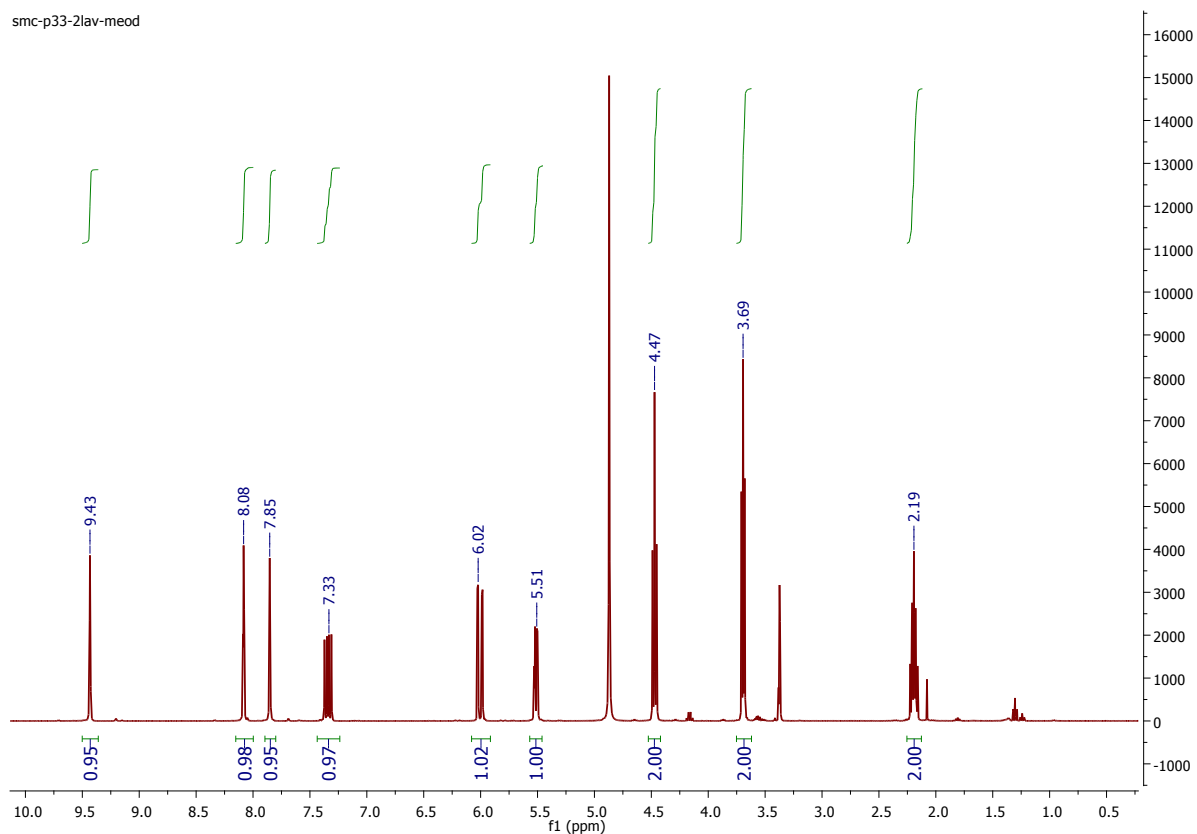

smc-p33-2lav-meod

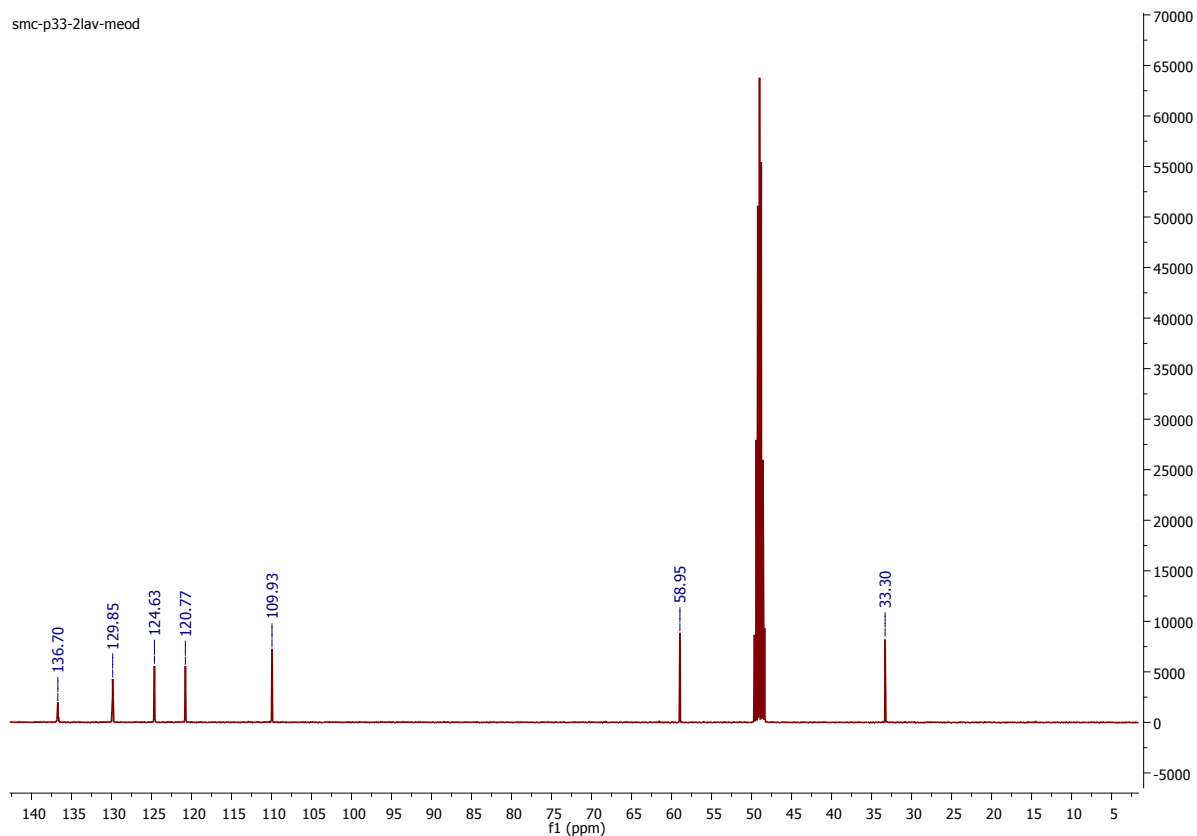

Then,  $\text{LiNTf}_2$  (6.46 g, 22.7 mmol) was dissolved in water (8 mL) and it was added dropwise to an aqueous solution (10 mL) of 1-(3-hydroxypropyl)-3-vinylimidazolium bromide (3.50 g, 15.1 mmol). The mixture formed two liquid phases. The mixture was stirred rapidly for 6 h at room

temperature. The phases were then separated and the aqueous phase was extracted four times with dichloromethane (25 mL). The combined organic phases were washed four times with water (10 mL) and dried over Na<sub>2</sub>SO<sub>4</sub>. The product was further dried under reduced pressure at 45 °C for 3 h. The yield was 90 % (5.86 g).

<sup>1</sup>H NMR (400 MHz, CD<sub>3</sub>OD): δ / ppm = 9.28 (s, 1H), 8.03 (t, J = 1.6 Hz, 1H), 7.79 (t, J = 2.0 Hz, 1H), 7.28 (dd, J = 15.6, 8.8 Hz, 1H), 5.99 (dd, J = 15.6, 2.8 Hz, 1H), 5.51 (dd, J = 8.4, 2.4 Hz, 1H), 4.44 (t, J = 7.2 Hz, 2H), 3.69 (t, J = 6 Hz, 2H), 2.21-2.15 (m, 2H); <sup>13</sup>C NMR (101 MHz, CD<sub>3</sub>OD): δ / ppm = 136.5, 129.7, 124.6, 122.8 (q, CF<sub>3</sub>), 120.7, 109.9, 61.5, 58.9 33.2. Elemental Analysis: Calculated: C, 27.72; H, 3.02; N, 9.7; Found: C, 24.5; H, 2.67; N, 8.73.

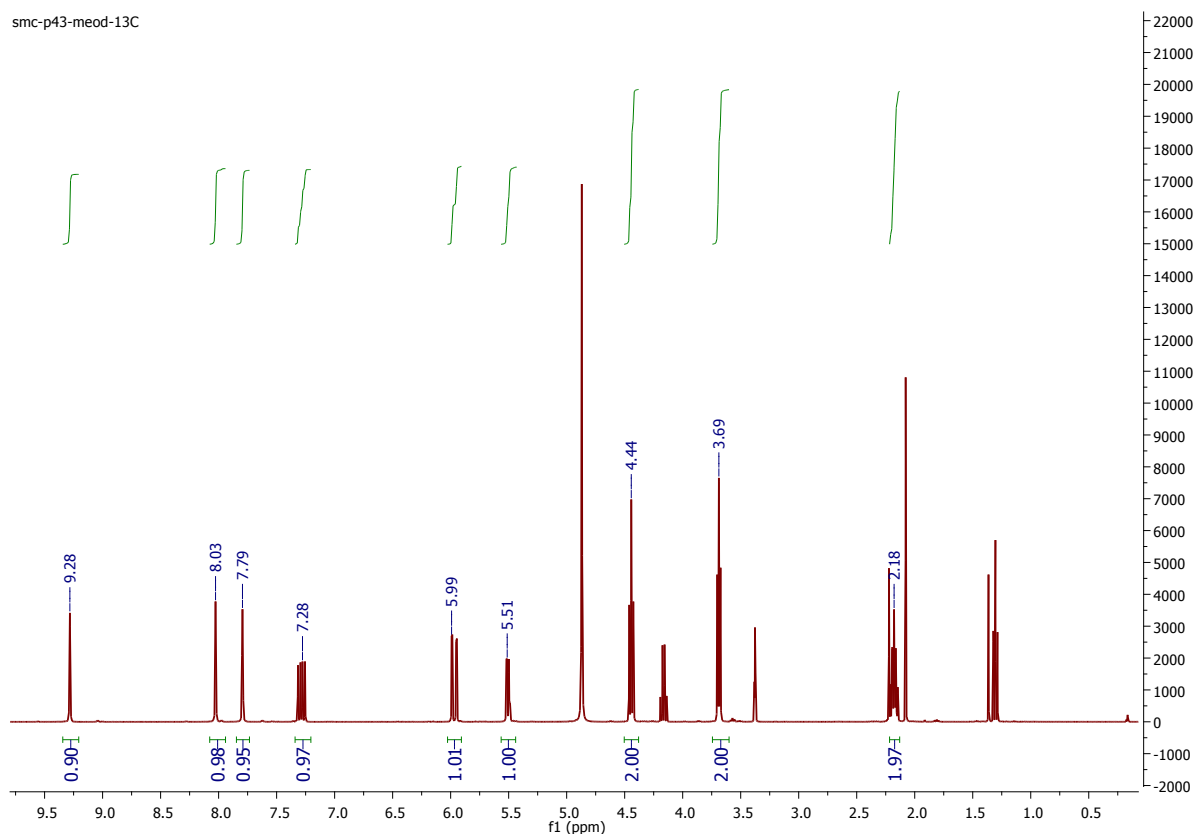

smc-p43-meod-13C

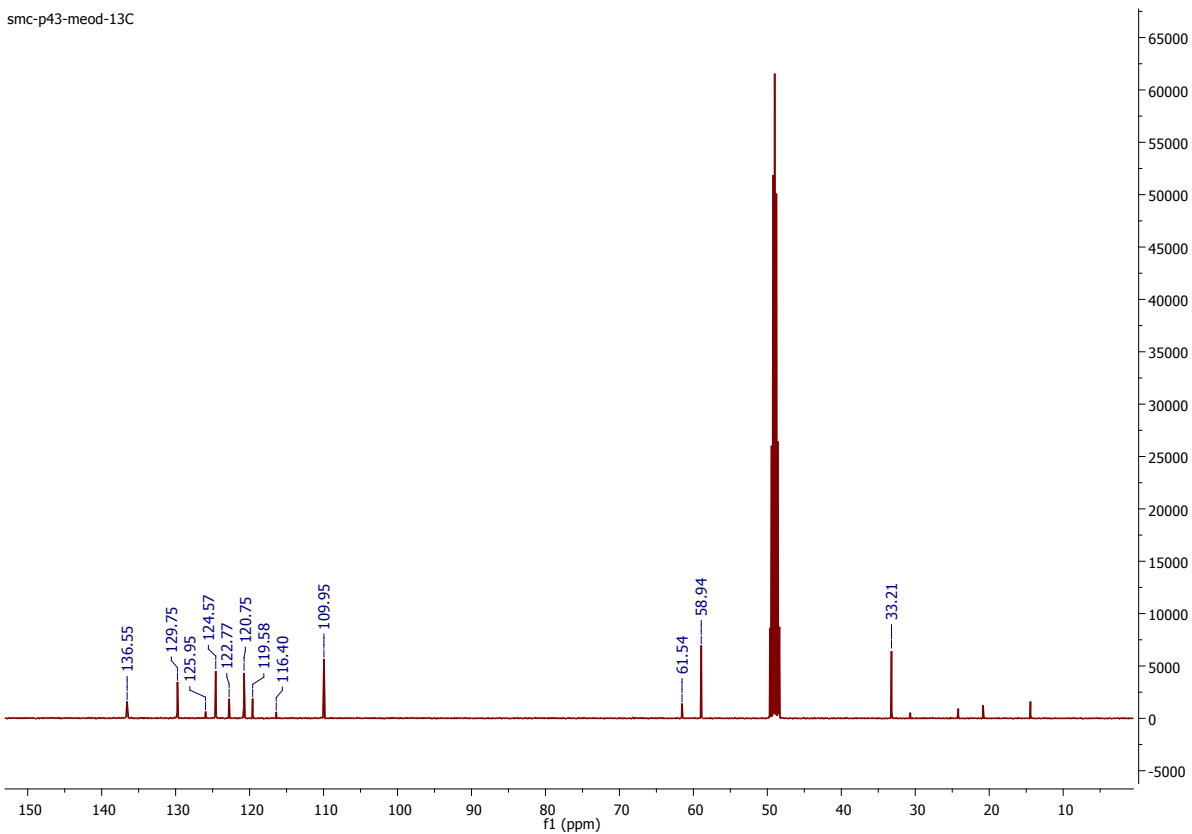

Supplement: d1bm00430a1.pdf [file d1bm00430a1.pdf]
